# Supplementary material
Source: Springer Nature journal article supplement (https://www.springermedizin.de/resource/supplementary/13063_2012_1015_MOESM2_ESM.pdf/9619694)
Supplement: MOESM2 [file 9619694]

CST training/manual

CST Manual only

Inclusion criteria for staff met  
Screened & consent gained  
Provision of Maintenance CST Manual and DVD

Baseline Assessment (0/12 months) & socio-demographic information

Cluster randomisation

Outreach

No outreach

1<sup>st</sup> follow up assessment (6/12 months)

2<sup>nd</sup> follow up assessment (12/12 months)
